# Supplementary material
Source: Research Square preprint supplement (doi:10.21203/rs.3.rs-9536384/v1)
Supplement: Supplementary file 1 [file 835165f7f4e1260c5a9fe0c5.docx]

Supplementary Table 1. Stimulation Treatment by Intermittent Theta Burst Stimulation (iTBS) Protocols Applied in Current Study

| Specifics | Randomized Clinical Trial | Regular Practice |
| --- | --- | --- |
| Protocol name | Accelerated prolonged intermittent theta burst stimulation | Accelerated intermittent theta burst stimulation |
| Frequency | 50 Hz triplets bursts at 5 Hz, given every 200 ms for 2-second trains and 8-second intervals for 60 cycles | 50 Hz triplets bursts at 5 Hz, given every 200 ms for 2-second trains and 8-second intervals for 60 cycles |
| Brain target | left DLPFC | left DLPFC |
| Intensity | 90% RMT | 80% RMT |
| Number of pulses per session | 1,800 pulses (~10 min) | 600 pulses (~3 min) |
| Sessions per day | 3 (60 mins apart) | 4 (30 mins apart) |
| Treatment duration | 2 weeks (30 sessions in total) | 2 weeks (20 sessions in total) |
| Total pulses | 54,000 pulses | 12,000 pulses |
| Localization | Beam F3 method | Beam F3 method |

Abbreviations: DLPFC, dorsolateral prefrontal cortex; RMT, resting motor threshold, as measured from the right first dorsal interosseous muscle by a handheld 700-mm figure-of-eight coil (Magstim D70 alpha coil)

Supplementary Table 2. Summary of Depression Rating Scales and Definitions of Treatment Response and Remission (1, 2)

| Scale | Response | Remission |
| --- | --- | --- |
| Montgomery-Åsberg Depression Rating Scale (MADRS)   - Clinician-rated - 10 items, each scored 0-6, total score: 60 - Focuses on psychological symptoms | Reduction ≥ 50% | Score < 11 |
| 17-item Hamilton Depression Rating Scale (HAM-D17)   - Clinician-rated - 17 items with varying scoring (0–2 or 0–4); total score: 52 - Higher proportion of somatic symptoms | Reduction ≥ 50% | Score < 8 |

Supplementary Table 3. Baseline demographic and clinical features of the study cohort, consisting of intervention groups in RCTs and standard treatment recipients in regular practice (N=43)

| Baseline characteristics | No. of Patients (%) / Mean ± SD |
| --- | --- |
| Treatment type  Intervention arms in RCTs  Regular treatment | 38 (88.37%)  5 (11.63%) |
| Age (years) | 41.93 ± 13.07 |
| Sex  Female  Male | 31 (72.09%)  12 (27.91%) |
| Education (years)  ≤ 9  10-12  >12 | 1 (2.33%)  20 (46.51%)  22 (51.16%) |
| Employment status  Full-time  Part-time  Student/housemaker  Retired  Unemployed | 21 (48.84%)  0 (0%)  3 (6.98%)  1 (2.33%)  18 (41.86%) |
| Marital status  Married  Single  Divorced/Separated  Widowed | 12 (27.91%)  26 (60.47%)  3 (6.98%)  2 (4.65%) |
| Previous experience of rTMS  No  Yes | 39 (90.70%)  4 (9.30%) |
| Number of hospitalization(s) for MDD/TRD in the past year  0  1  ≥2 | 36 (83.72%)  6 (13.95%)  1 (2.33%) |

| TMS protocol type  RCT-iTBS  Regular treatment-iTBS | 38 (88.37%)  5 (11.63%) |
| --- | --- |
| Maudsley Staging Method score | 8.40 ± 1.20 |
| HAM-D17 scores at baseline (n=43) | 25.26 ± 4.88 |
| MADRS scores at baseline (n=38) | 33.34 ± 6.40 |

Abbreviations: iTBS, intermittent theta burst stimulation; MADRS, Montgomery-Åsberg Depression Rating Scale; HAM-D17, 17-item Hamilton Depression Rating Scale

Supplementary Figure 1. Receiver Operating Characteristic Curves of Intermittent Theta Burst Stimulation (iTBS) Treatment Response, Assessed by 17-item Hamilton Depression Rating Scale (HAM-D17), by Differences of Heart Rate Metrics in the 15-15s Recording Period (N=42)

Standard Deviation of NN Intervals (SDNN)

Heart Rate (HR)

Total Power (TP)

Low Frequency / High Frequency Ratio (LF/HF ratio)

High Frequency (HF)

Low Frequency (LF)

Proportion of NN50 Divided by the Total Number of NN Intervals (pNN50)

Root Mean Square of Successive Difference (RMSSD)

Supplementary Figure 2. Receiver Operating Characteristic Curves of Intermittent Theta Burst Stimulation (iTBS) Treatment Response, Assessed by Montgomery-Åsberg Depression Rating Scale (MADRS), by Differences of Heart Rate Metrics in the 15-15s Recording Period (N=37)

Standard Deviation of NN Intervals (SDNN)

Heart Rate (HR)

Total Power (TP)

Low Frequency (LF)

Low Frequency / High Frequency Ratio (LF/HF ratio)

High Frequency (HF)

Proportion of NN50 Divided by the Total Number of NN Intervals (pNN50)

Root Mean Square of Successive Difference (RMSSD)

Supplementary Figure 3. Receiver Operating Characteristic Curves of Intermittent Theta Burst Stimulation (iTBS) Treatment Response, Assessed by 17-item Hamilton Depression Rating Scale (HAM-D17), by Differences of Heart Rate Metrics in the 15-30s Recording Period (N=42)

Standard Deviation of NN Intervals (SDNN)

Heart Rate (HR)

Low Frequency / High Frequency Ratio (LF/HF ratio)

Total Power (TP)

High Frequency (HF)

Low Frequency (LF)

Proportion of NN50 Divided by the Total Number of NN Intervals (pNN50)

Root Mean Square of Successive Difference (RMSSD)

Supplementary Figure 4. Receiver Operating Characteristic Curves of Intermittent Theta Burst Stimulation (iTBS) Treatment Response, Assessed by Montgomery-Åsberg Depression Rating Scale (MADRS), by Differences of Heart Rate Metrics in the 15-30s Recording Period (N=37)

Standard Deviation of NN Intervals (SDNN)

Heart Rate (HR)

Low Frequency / High Frequency Ratio (LF/HF ratio)

Total Power (TP)

High Frequency (HF)

Low Frequency (LF)

Proportion of NN50 Divided by the Total Number of NN Intervals (pNN50)

Root Mean Square of Successive Difference (RMSSD)

Supplementary Figure 5. Receiver Operating Characteristic Curves of Intermittent Theta Burst Stimulation (iTBS) Treatment Response, Assessed by 17-item Hamilton Depression Rating Scale (HAM-D17), by Differences of Heart Rate Metrics in the 15-60s Recording Period (N=42)

Standard Deviation of NN Intervals (SDNN)

Heart Rate (HR)

Low Frequency / High Frequency Ratio (LF/HF ratio)

Total Power (TP)

High Frequency (HF)

Low Frequency (LF)

Root Mean Square of Successive Difference (RMSSD)

Proportion of NN50 Divided by the Total Number of NN Intervals (pNN50)

Supplementary Figure 6. Receiver Operating Characteristic Curves of Intermittent Theta Burst Stimulation (iTBS) Treatment Response, Assessed by Montgomery-Åsberg Depression Rating Scale (MADRS), by Differences of Heart Rate Metrics in the 15-60s Recording Period (N=37)

Standard Deviation of NN Intervals (SDNN)

Heart Rate (HR)

Total Power (TP)

Low Frequency / High Frequency Ratio (LF/HF ratio)

High Frequency (HF)

Low Frequency (LF)

Proportion of NN50 Divided by the Total Number of NN Intervals (pNN50)

Root Mean Square of Successive Difference (RMSSD)

Supplementary Figure 7. Receiver Operating Characteristic Curves of Intermittent Theta Burst Stimulation (iTBS) Treatment Response, Assessed by 17-item Hamilton Depression Rating Scale (HAM-D17), by Differences of Heart Rate Metrics in the 15-180s Recording Period (N=42)

Standard Deviation of NN Intervals (SDNN)

Heart Rate (HR)

Low Frequency / High Frequency Ratio (LF/HF ratio)

Total Power (TP)

High Frequency (HF)

Low Frequency (LF)

Proportion of NN50 Divided by the Total Number of NN Intervals (pNN50)

Root Mean Square of Successive Difference (RMSSD)

Supplementary Figure 8. Receiver Operating Characteristic Curves of Intermittent Theta Burst Stimulation (iTBS) Treatment Response, Assessed by Montgomery-Åsberg Depression Rating Scale (MADRS), by Differences of Heart Rate Metrics in the 15-180s Recording Period (N=37)

Standard Deviation of NN Intervals (SDNN)

Heart Rate (HR)

High Frequency (HF)

Low Frequency / High Frequency Ratio (LF/HF ratio)

Total Power (TP)

Low Frequency (LF)

Proportion of NN50 Divided by the Total Number of NN Intervals (pNN50)

Root Mean Square of Successive Difference (RMSSD)

Supplementary Figure 9. Receiver Operating Characteristic Curves of Intermittent Theta Burst Stimulation (iTBS) Treatment Response, Assessed by 17-item Hamilton Depression Rating Scale (HAM-D17), by Differences of Heart Rate Metrics in the 30-30s Recording Period (N=43)

Standard Deviation of NN Intervals (SDNN)

Heart Rate (HR)

Low Frequency / High Frequency Ratio (LF/HF ratio)

Total Power (TP)

High Frequency (HF)

Low Frequency (LF)

Proportion of NN50 Divided by the Total Number of NN Intervals (pNN50)

Root Mean Square of Successive Difference (RMSSD)

Supplementary Figure 10. Receiver Operating Characteristic Curves of Intermittent Theta Burst Stimulation (iTBS) Treatment Response, Assessed by Montgomery-Åsberg Depression Rating Scale (MADRS), by Differences of Heart Rate Metrics in the 30-30s Recording Period (N=38)

Heart Rate (HR)

Standard Deviation of NN Intervals (SDNN)

High Frequency (HF)

Low Frequency / High Frequency Ratio (LF/HF ratio)

Total Power (TP)

Low Frequency (LF)

Proportion of NN50 Divided by the Total Number of NN Intervals (pNN50)

Root Mean Square of Successive Difference (RMSSD)

Supplementary Figure 11. Receiver Operating Characteristic Curves of Intermittent Theta Burst Stimulation (iTBS) Treatment Response, Assessed by 17-item Hamilton Depression Rating Scale (HAM-D17), by Differences of Heart Rate Metrics in the 30-60s Recording Period (N=43)

Standard Deviation of NN Intervals (SDNN)

Heart Rate (HR)

Low Frequency (LF)

Low Frequency / High Frequency Ratio (LF/HF ratio)

High Frequency (HF)

Total Power (TP)

Proportion of NN50 Divided by the Total Number of NN Intervals (pNN50)

Root Mean Square of Successive Difference (RMSSD)

Supplementary Figure 12. Receiver Operating Characteristic Curves of Intermittent Theta Burst Stimulation (iTBS) Treatment Response, Assessed by Montgomery-Åsberg Depression Rating Scale (MADRS), by Differences of Heart Rate Metrics in the 30-60s Recording Period (N=38)

Standard Deviation of NN Intervals (SDNN)

Heart Rate (HR)

Low Frequency / High Frequency Ratio (LF/HF ratio)

Total Power (TP)

High Frequency (HF)

Low Frequency (LF)

Proportion of NN50 Divided by the Total Number of NN Intervals (pNN50)

Root Mean Square of Successive Difference (RMSSD)

Supplementary Figure 13. Receiver Operating Characteristic Curves of Intermittent Theta Burst Stimulation (iTBS) Treatment Response, Assessed by 17-item Hamilton Depression Rating Scale (HAM-D17), by Differences of Heart Rate Metrics in the 30-180s Recording Period (N=43)

Standard Deviation of NN Intervals (SDNN)

Heart Rate (HR)

Low Frequency / High Frequency Ratio (LF/HF ratio)

High Frequency (HF)

Total Power (TP)

Low Frequency (LF)

Root Mean Square of Successive Difference (RMSSD)

Proportion of NN50 Divided by the Total Number of NN Intervals (pNN50)

Supplementary Figure 14. Receiver Operating Characteristic Curves of Intermittent Theta Burst Stimulation (iTBS) Treatment Response, Assessed by Montgomery-Åsberg Depression Rating Scale (MADRS), by Differences of Heart Rate Metrics in the 30-180s Recording Period (N=38)

Standard Deviation of NN Intervals (SDNN)

Heart Rate (HR)

Low Frequency / High Frequency Ratio (LF/HF ratio)

Total Power (TP)

High Frequency (HF)

Low Frequency (LF)

Proportion of NN50 Divided by the Total Number of NN Intervals (pNN50)

Root Mean Square of Successive Difference (RMSSD)

Supplementary Figure 15. Receiver Operating Characteristic Curves of Intermittent Theta Burst Stimulation (iTBS) Treatment Response, Assessed by 17-item Hamilton Depression Rating Scale (HAM-D17), by Differences of Heart Rate Metrics in the 60-60s Recording Period (N=43)

Standard Deviation of NN Intervals (SDNN)

Heart Rate (HR)

Low Frequency / High Frequency Ratio (LF/HF ratio)

Total Power (TP)

High Frequency (HF)

Low Frequency (LF)

Proportion of NN50 Divided by the Total Number of NN Intervals (pNN50)

Root Mean Square of Successive Difference (RMSSD)

Supplementary Figure 16. Receiver Operating Characteristic Curves of Intermittent Theta Burst Stimulation (iTBS) Treatment Response, Assessed by Montgomery-Åsberg Depression Rating Scale (MADRS), by Differences of Heart Rate Metrics in the 60-60s Recording Period (N=38)

Standard Deviation of NN Intervals (SDNN)

Heart Rate (HR)

Low Frequency / High Frequency Ratio (LF/HF ratio)

Total Power (TP)

High Frequency (HF)

Low Frequency (LF)

Proportion of NN50 Divided by the Total Number of NN Intervals (pNN50)

Root Mean Square of Successive Difference (RMSSD)

Supplementary Figure 17. Receiver Operating Characteristic Curves of Intermittent Theta Burst Stimulation (iTBS) Treatment Response, Assessed by 17-item Hamilton Depression Rating Scale (HAM-D17), by Differences of Heart Rate Metrics in the 60-180s Recording Period (N=43)

Standard Deviation of NN Intervals (SDNN)

Heart Rate (HR)

Low Frequency / High Frequency Ratio (LF/HF ratio)

Total Power (TP)

Low Frequency (LF)

Proportion of NN50 Divided by the Total Number of NN Intervals (pNN50)

Root Mean Square of Successive Difference (RMSSD)

High Frequency (HF)

Supplementary Figure 18. Receiver Operating Characteristic Curves of Intermittent Theta Burst Stimulation (iTBS) Treatment Response, Assessed by Montgomery-Åsberg Depression Rating Scale (MADRS), by Differences of Heart Rate Metrics in the 60-180s Recording Period (N=38)

Standard Deviation of NN Intervals (SDNN)

Heart Rate (HR)

Low Frequency / High Frequency Ratio (LF/HF ratio)

Total Power (TP)

High Frequency (HF)

Low Frequency (LF)

Proportion of NN50 Divided by the Total Number of NN Intervals (pNN50)

Root Mean Square of Successive Difference (RMSSD)

**Reference**

1. Snaith P (1993): What Do Depression Rating Scales Measure? *Br J Psychiatry*. 163:293-298.

2. Riedel M, Möller H-J, Obermeier M, Schennach-Wolff R, Bauer M, Adli M, et al. (2010): Response and remission criteria in major depression – A validation of current practice. *J Psychiatr Res*. 44:1063-1068.
